# Supplementary material for: An ultra high performance multi-element doped mesoporous carbon catalyst derived from poly(4-vinylpyridine)
Source: Royal Society of Chemistry journal article supplement (doi:10.1039/c5ta05599g), 2015-01-01
Supplement: c5ta05599g1.pdf [file c5ta05599g1.pdf]

## Supporting Information

### Ultra high performance multi-element doped mesoporous carbon catalyst derived from poly(4-vinylpyridine)

**Chenghang You<sup>a</sup>, Dai Dang<sup>a</sup>, Xiaochang Qiao<sup>a</sup>, Guanghua Wang<sup>a</sup>, Wenjun Fan<sup>a</sup>, Rong Chen<sup>a</sup>, Yingwei Li<sup>a</sup>, Xiuhua Li<sup>a</sup>, Shijun Liao<sup>a\*</sup>**

*<sup>a</sup>The Key Laboratory of Fuel Cell Technology of Guangdong Province, School of Chemistry and Chemical Engineering, South China University of Technology, Guangzhou, 510641, China, Fax: +86 20 8711 3586.  
E-mail address: chsjliao@scut.edu.cn*

#### Experimental

##### Preparation of SBA-15 template

The SBA-15 templates were prepared by using a triblock copolymer Plurionic P123 (EO<sub>20</sub>PO<sub>70</sub>EO<sub>20</sub>, Mw~5800, Aldrich) as the soft templates through a procedures similar to the ones previously reported by Vinu<sup>1</sup> and Qiao<sup>2</sup>.

Briefly, 4 g triblock copolymer Plurionic P123 was dispersed in 150 ml 2 M HCl solution and stirred for 4 hours gently. Subsequently, 9 g tetraethylorthosilicate (TEOS) was added. The mixture was then stirred vigorously for 6 min before it was aged for 24 h at 40 °C. Thereafter, the obtained gels were transfer into autoclaves and heated at 140 °C for 24 h. The as-prepared SBA-15 were collected by filtration, rinsed with deionized water, dried at 100 °C and finally calcined at 550 °C for 6 h in the air to obtain the final product.

##### Preparation of samples for thermogravimetric analysis (TGA)

The PVPyFe for TGA and XPS measurements was obtained from poly(4-vinylpyridine) (PVPy) and FeCl<sub>3</sub>, with the same mole ratio through a similar procedure to the one of the precursor preparation, but without any addition of SBA-15 template.

## Characterization

**Table S1** EA results of various catalysts

| catalysts | CPVFe-900 | CPVFe-S-600 | CPVFe-S-750 | CPVFe-S-900 |
|-----------|-----------|-------------|-------------|-------------|
| Element   | (wt%)     | (wt%)       | (wt%)       | (wt%)       |
| N         | 1.4       | 7.8         | 5.3         | 3.0         |
| C         | 88.5      | 74.6        | 70.6        | 81.6        |
| H         | 1.1       | 2.2         | 2.4         | 2.3         |

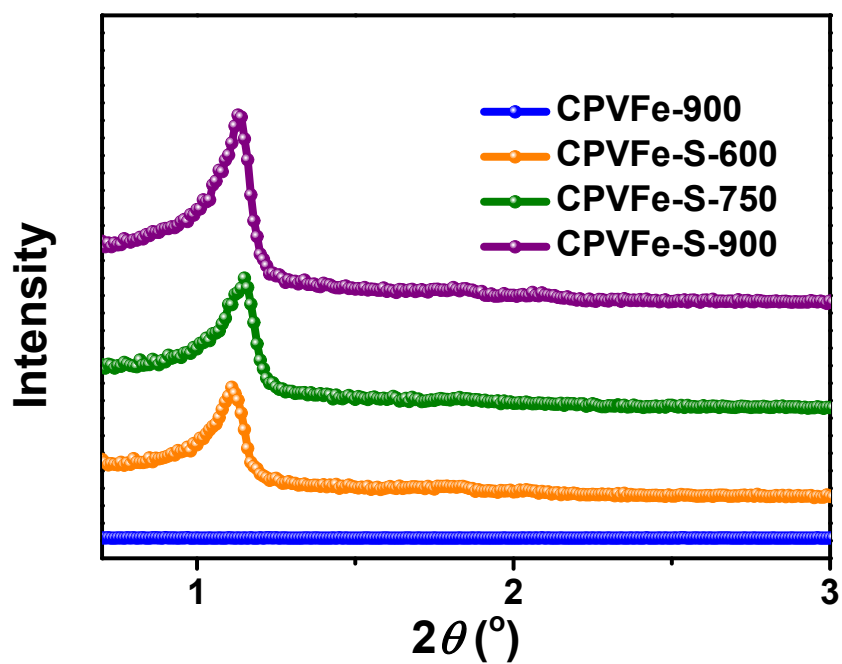

**Fig. S1** Small-angle XRD patterns of the as-prepared catalysts

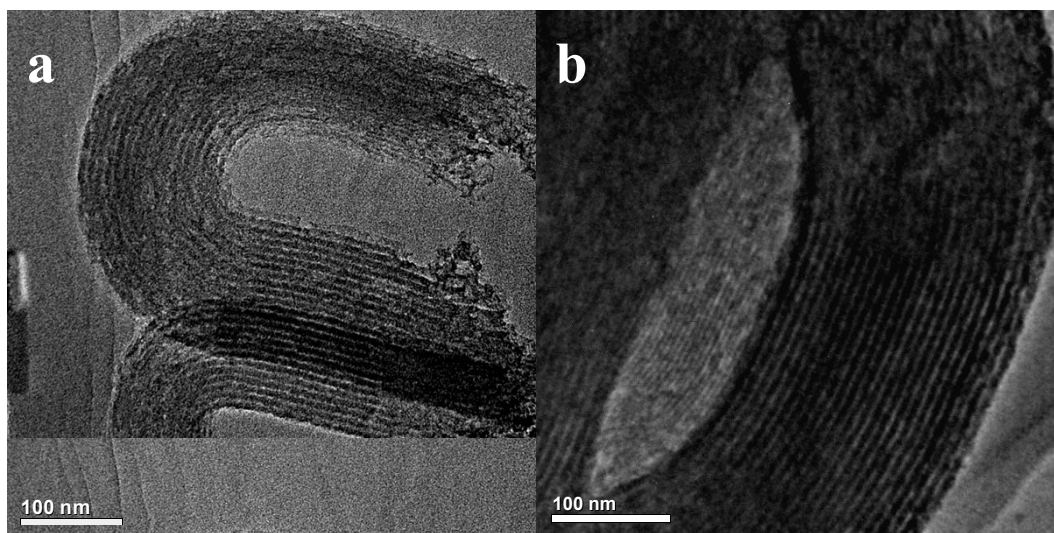

**Fig. S2** TEM images: (a) CPVFe-S-600; (b) CPVFe-S-750

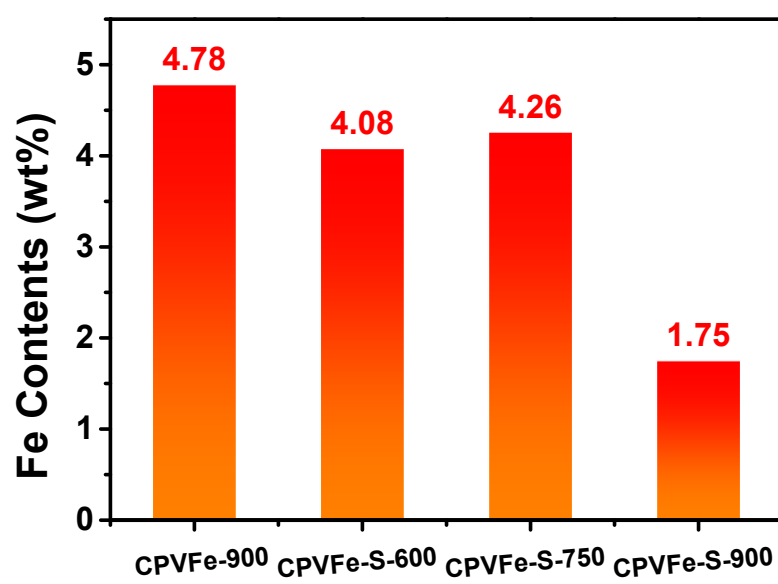

**Fig. S3** ICP-AES results of various catalysts

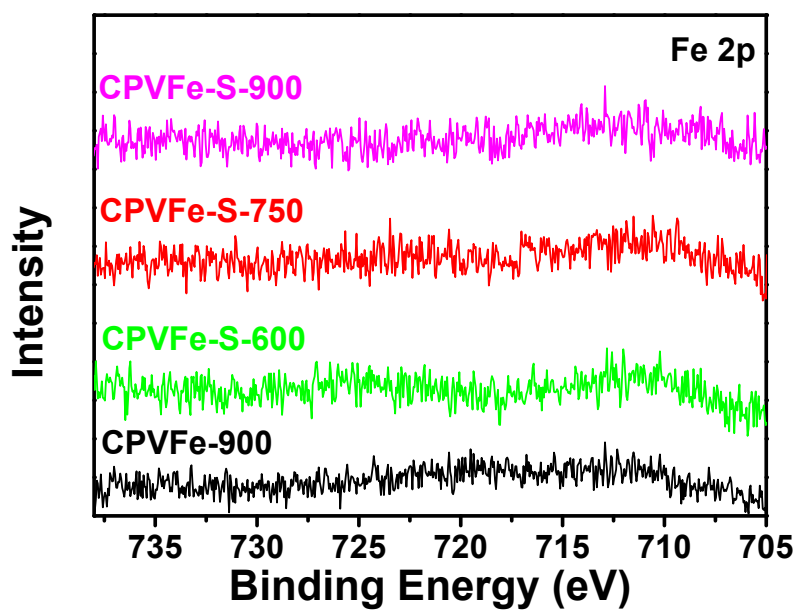

Fig. S4 High resolution Fe2p XPS spectra of various catalysts.

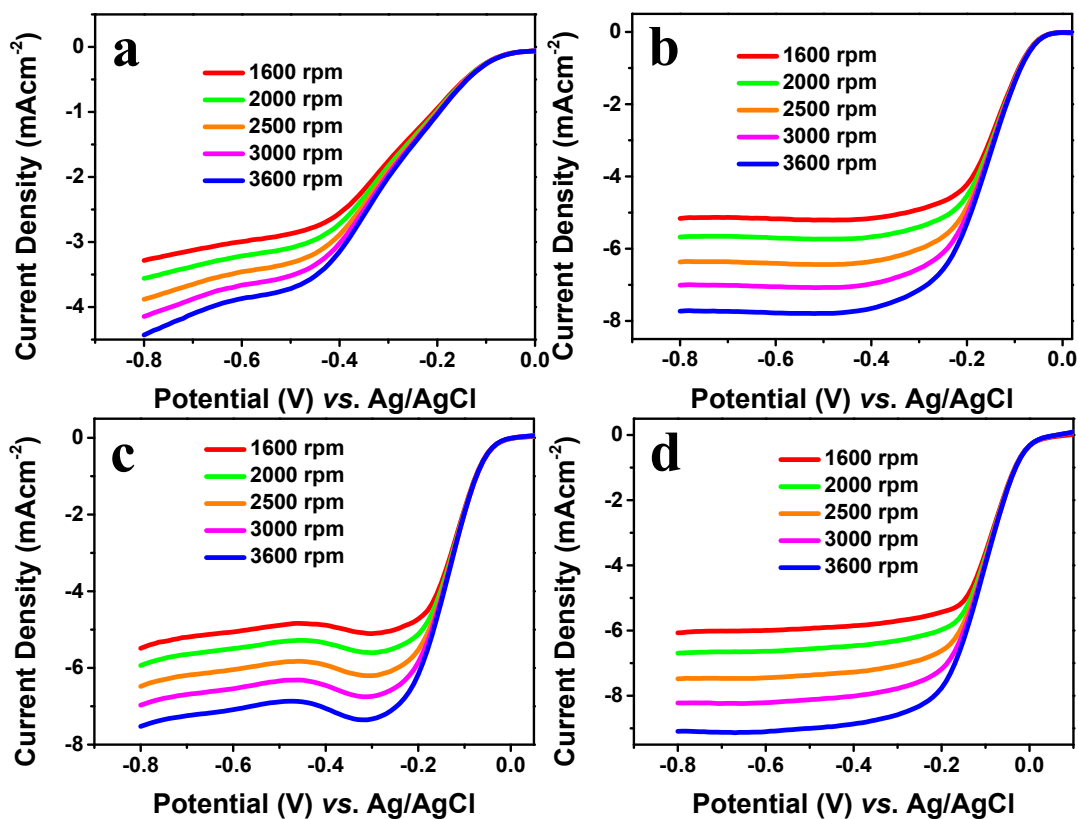

Fig. S5 LSV curves of various catalysts under different rotation rates: (a) CPVFe-900; (b) CPVFe-S-600; (c) CPVFe-S-750; (d) CPVFe-S-900.

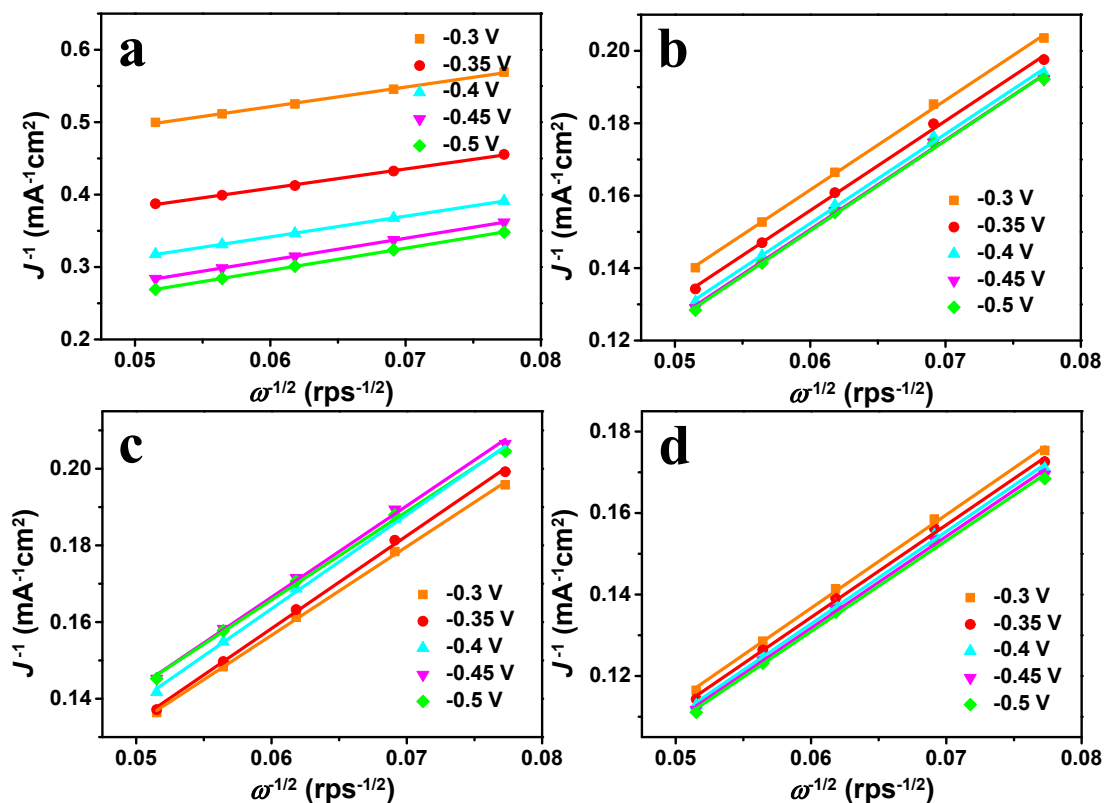

**Fig. S6** K-L plots of various catalysts: (a) CPVFe-900; (b) CPVFe-S-600; (c) CPVFe-S-750; (d) CPVFe-S-900.

#### References:

1. A. Vinu, *Adv Funct Mater*, 2008, **18**, 816-827.
2. Y. Zheng, Y. Jiao, J. Chen, J. Liu, J. Liang, A. Du, W. M. Zhang, Z. H. Zhu, S. C. Smith, M. Jaroniec, G. Q. Lu and S. Z. Qiao, *J Am Chem Soc*, 2011, **133**, 20116-20119.
